# Supplementary material
Source: HighWire-hosted journal article supplement (https://www.annfammed.org/highwire/filestream/13674/field_highwire_adjunct_files/0/Loohuis_Supp_App.pdf)
Supplement: Loohuis_Supp_App.pdf [file Loohuis_Supp_App.pdf]

## **Supplemental materials for:**

Loohuis AM, Wessels NJ, Dekker JH, et al. App-based treatment in primary care for urinary incontinence: a pragmatic, randomized controlled trial. *Ann Fam Med*. 2021;19(2):102-109.

## **Supplemental Appendices**

### **Supplemental Appendix:** Full inclusion and exclusion criteria

We used the following inclusion criteria: female sex; age  $\geq 18$  years; self-reported stress, urgency, or mixed UI at least twice a week according to the Three Incontinence Questions (3IQ); wanting treatment; and access to a smartphone or tablet. Women are excluded in case of: indwelling urinary catheter, urogenital malignancy, previous surgery for UI, treatment for UI in the previous year (pharmacological or non-pharmacological), terminal or serious illness, cognitive impairment, psychiatric illness, urinary tract infection (UTI) (dipstick, and if negative, dipslide or urine culture), overflow or continuous UI, pregnancy or recent childbirth (<6 months ago) or the inability to complete a questionnaire in Dutch.

**Supplemental Table 1:** Loss to follow-up sample; baseline characteristics and analysis of differences with sample available for follow-up

| Characteristics                           | Available at FU | N*  | Loss to FU    | N* | Difference (95%CI) or p-value    |
|-------------------------------------------|-----------------|-----|---------------|----|----------------------------------|
| <b>Age, (years)</b>                       | 53.4 ± 11.3     | 195 | 49.0 ± 12.2   | 67 | <b>-4.445 (-7.654 to -1.237)</b> |
| <b>Body mass index (kg/m<sup>2</sup>)</b> | 27.3 ± 5.0      | 195 | 29.3 ± 6.0    | 66 | <b>1.997 (0.518 to 0.3475)</b>   |
| <b>Higher educational level</b>           | 101 (51.8%)     | 195 | No data at FU | -  | -                                |
| <b>≥1 Vaginal births</b>                  | 165 (84.6%)     | 195 | 51 (77.3%)    | 66 | 0.241 (X <sup>2</sup> )          |
| <b>Postmenopausal status, yes</b>         | 26 (39.4%)      | 195 | 26 (39.4%)    | 66 | 0.345 (X <sup>2</sup> )          |
| <b>Recruitment type</b>                   |                 | 195 |               | 67 | 0.154 (X <sup>2</sup> )          |
| General practitioner                      | 108 (55.4%)     |     | 44 (65.7%)    |    |                                  |
| Lay press or social media                 | 87 (44.6%)      |     | 23 (34.3%)    |    |                                  |
| <b>Duration of UI (years)</b>             | 8.0 (5–14)      | 195 | 5.2 (3–12)    | 67 | 0.062 (U-statistic)              |
| <b>Type of UI</b>                         |                 | 195 |               | 67 | 0.104 (X <sup>2</sup> )          |
| Stress                                    | 76 (39.0%)      |     | 34 (50.7%)    |    |                                  |
| Mixed, stress predominant                 | 56 (28.7%)      |     | 14 (20.6%)    |    |                                  |
| Urgency                                   | 20 (10.3%)      |     | 2 (3.0%)      |    |                                  |
| Mixed, urgency predominant                | 43 (22.1%)      |     | 17 (25.4%)    |    |                                  |
| <b>Previous treatment for UI</b>          |                 | 195 |               | 66 | <b>0.012 (X<sup>2</sup>)</b>     |
| None                                      | 137 (70.3%)     |     | 57 (86.4%)    |    |                                  |
| Pessary                                   | 1 (0.5%)        |     |               |    |                                  |
| Physical therapist                        | 57 (29.2%)      |     | 9 (13.6%)     |    |                                  |

**Incontinence severity**

|                    |                 |     |                  |    |                         |
|--------------------|-----------------|-----|------------------|----|-------------------------|
| ICIQ-UI SF score   | 9.8 ± 3.1       | 194 | 10.1 ± 3.7       | 65 | 0.324 (-0.604 to 1.252) |
| ICIQ-LUTSqol score | 33.2 ± 7.4      | 194 | 35.0 ± 9.5       | 65 | 1.794 (-0.466 to 4.054) |
| UI (per day)       | 1.0 (0.33–2.16) | 194 | 0.83 (0.33–3.08) | 65 | 0.321 (U-statistic)     |

---

Values are means ± standard deviation, numbers (%), or medians (interquartile range). \*Explanation differences in N: missing data of one baseline assessment and three baseline questionnaires. Educational level was assessed at follow-up. Abbreviations: ICIQ-UI SF, International Consultation on Incontinence Modular Questionnaire Urinary Incontinence Short Form; ICIQ-LUTSqol, ICIQ lower urinary tract symptoms quality of life; UI, urinary incontinence.

---

**Supplemental Table 2:** Per protocol study sample baseline characteristics of participants  
assigned to App-based treatment or care-as-usual

| Characteristics                           | App-treatment | N  | Care as usual | N  |
|-------------------------------------------|---------------|----|---------------|----|
| <b>Age, (years)</b>                       | 54.2 ± 12.4   | 96 | 53.0 ± 9.4    | 75 |
| <b>Body mass index (kg/m<sup>2</sup>)</b> | 26.6 ± 4.7    | 96 | 28.1 ± 5.5    | 75 |
| <b>Higher educational level</b>           | 52 (54.2%)    | 96 | 37 (49.3%)    | 75 |
| <b>Vaginal births, ≥1</b>                 | 84 (87.5%)    | 96 | 63 (84.0%)    | 75 |
| <b>Postmenopausal status, yes</b>         | 48 (50.0%)    | 96 | 38 (50.7%)    | 75 |
| <b>Recruitment type</b>                   |               | 96 |               | 75 |
| General practitioner                      | 52 (54.2%)    |    | 40 (53.3%)    |    |
| Lay press or social media                 | 44 (45.8%)    |    | 35 (46.7%)    |    |
| <b>Duration of UI (years)</b>             | 9.5 (5–15)    | 96 | 8.0 (4–18)    | 75 |
| <b>Type of UI</b>                         |               | 96 |               | 75 |
| Stress                                    | 35 (36.5%)    |    | 30 (40.0%)    |    |
| Mixed, stress predominant                 | 26 (27.1%)    |    | 22 (29.3%)    |    |
| Urgency                                   | 11 (11.5%)    |    | 7 (9.3%)      |    |
| Mixed, urgency predominant                | 24 (25.0%)    |    | 16 (21.3%)    |    |
| <b>Previous treatment for UI</b>          |               | 96 |               | 75 |
| None                                      | 70 (72.9%)    |    | 49 (65.3%)    |    |
| Physical therapist                        | 26 (27.1%)    |    | 26 (34.7%)    |    |
| <b>Incontinence severity</b>              |               |    |               |    |

|                    |                 |    |                 |    |
|--------------------|-----------------|----|-----------------|----|
| ICIQ-UI SF score   | 9.2 ± 2.9       | 96 | 10.7 ± 3.1      | 75 |
| ICIQ-LUTSqol score | 33.0 ± 7.5      | 96 | 34.2 ± 7.4      | 75 |
| UI (per day)       | 1.0 (0.33–2.00) | 96 | 1.3 (0.50–2.33) | 75 |

---

Values are means ± standard deviation, numbers (%), or medians (interquartile range).. Educational level was assessed at follow-up. Abbreviations: ICIQ-UI SF, International Consultation on Incontinence Modular Questionnaire Urinary Incontinence Short Form; ICIQ-LUTSqol, ICIQ lower urinary tract symptoms quality of life; UI, urinary incontinence.

---

**Supplemental Table 3:** Unadjusted differences (95% CI) for the change of mean (SD) questionnaire scores from baseline to follow-up

| Outcomes            | Adjusted difference (95% CI) | Unadjusted difference (95% CI) |
|---------------------|------------------------------|--------------------------------|
| ICIQ-UI SF score    | 0.058 (-0.776 to 0.891)      | 0.401 (-0.464 to 1.266)        |
| ICIQ-LUTS-qol score | -0.566 (-2.035 to 0.902)     | -0.552 (-2.158 to 1.055)       |

Analyses performed on an intention to treat base without adjustment for baseline scores for the ICIQ-UI SF score and ICIQ-LUTS-qol score. Values are presented as means  $\pm$  standard deviation or as numbers (%). Abbreviations: ICIQ-UI SF, International Consultation on Incontinence Modular Questionnaire Urinary Incontinence Short Form; ICIQ-LUTS-qol, ICIQ lower urinary tract symptoms quality of life; UI, urinary incontinence.

**Supplemental Table 4:** Per protocol analysis for the change of mean UI severity (SD) from baseline to follow up per group allocation and adjusted difference (95% CI)

| Outcomes         | Change from baseline |     |                  |    | Adjusted difference (95% CI) |
|------------------|----------------------|-----|------------------|----|------------------------------|
|                  | App-treatment        | N   | Care as usual    | N  |                              |
| ICIQ-UI SF score | -2.15 $\pm$ 2.56     | 95* | -2.75 $\pm$ 3.62 | 75 | 0.071 (-0.837 to 0.979)      |

Analyses performed on a per protocol base. ICIQ-UI SF score adjusted for baseline. Values are presented as means  $\pm$  standard deviation. Abbreviations: ICIQ-UI SF, International Consultation on Incontinence Modular Questionnaire Urinary Incontinence Short Form; \*One baseline-questionnaire missing.
